# Supplementary material
Source: PubMed Central journal article supplement (PMC1618443)
Supplement: bmj_333_7573_839__1.pdf [file bmj_333_7573_839__1.pdf]

**Published as supplied by the authors**

## **Methods for assessing child health interventions**

Information about the impact of interventions in reducing child mortality by cause was obtained from published research studies, systematic reviews, and recent global reviews of evidence for interventions.<sup>2,4,9</sup> The level of evidence was categorized on the basis of available evidence and delivery strategies as either strong (Level I) or medium (Level II) and no intervention was included where the evidence was variable or uncertain. In addition to the 23 effective interventions considered in the child survival series,<sup>2</sup> we also included the 16 interventions selected by the Lancet neonatal series for in-depth evaluation of their impact on outcomes.<sup>4</sup> In all 28 interventions supported by level 1 or level 2 evidence are presented by their impacts and pathway for action (Web Table 1).w1-w55 Additional recent information on strategies such as the use of community support groups and health workers (w 56), strategies for prevention of infection such as hand washing (w57), point of use water purification (w58), chlorhexidine use after childbirth (w59), kangaroo baby care (w60) and micronutrient interventions (w61, w62) was also reviewed. Other promising interventions that are yet to be scaled up in developing countries e.g. Rotavirus vaccine (w63, 64), Pneumococcal conjugate vaccine (w65, 66) and Vi typhoid vaccine (w67, 68) were also considered. A number of interventions were not considered for inclusion in the current analysis because although evidence-based, they are not currently feasible for implementation at high coverage in low-income areas. These include interventions such as nasal CPAP therapy for preterm infants (w69), probiotics for preventing and treating diarrhea (w70) and Highly active anti-retroviral therapy (w71, w72).

The current coverage data for various interventions were obtained from the recent estimates from the WHO and Unicef.<sup>7,8</sup> Relating the current coverage estimates to the 2004 mortality estimates, we estimated the potential impact of these potential interventions on child mortality using a sequential impact model as used in the Newborn and Child survival series, assuming that 90% coverage for most interventions was achieved. Although accurate country level spending information on child health and survival research for the WHO EMR countries was not available, we evaluated available data on research spending and specifically child health research from the RPC division at WHO EMR (MAR & Dr M. Afzal, personal communication 2006). Additional funding details on projects addressing child health interventions in the region were obtained from other leading UN agencies (UNICEF, UNFPA), World Bank and Ministries of Health websites. Additional data on health system

governance and government expenditures was obtained from a variety of sources including the aforementioned data sources, the Corruption Perception Indices of Transparency International,(w75) the World Bank governance indicators,(w76) and findings of the Arab Development Report.(w77) These data, where applicable, were correlated with respective health system performance and child health intervention coverage indicators in the region.

We also evaluated existing policies for child health and survival in the region from available information from Ministry of Health documents and websites. While five of these high burden EMR countries had maternal and child health programs in place, it was difficult to assess their implementation or coverage. We evaluated the relationship between the “government effectiveness”, estimated through a composite measure of responses on the quality of public service provision, the quality of the bureaucracy, the competence of civil servants, the independence of the civil service from political pressures, and the credibility of the government’s commitment to policies. The main focus of the effectiveness estimate is on “inputs” required for the government to be able to produce and implement good policies and deliver public goods(w76) with infant mortality among the 22 EMR countries. Full data on specific spending on child health were not available. However, we examined the relation between the health to military spending ratios and infant mortality in the countries with the highest burden of child deaths.

### **Web References**

w1. Bhutta Z, Darmstadt G, Hasan B, Haws R. Community-based interventions for improving perinatal and neonatal outcomes in developing countries: a review of the evidence. *Pediatrics* 2005; **115**: 519–617.

w2. Setty-Venugopal V, Upadhyay UD. Birth spacing: three to five saves lives. Population Reports, Series L, No 13. Baltimore: Johns Hopkins Bloomberg School of Public Health, Population Information Program, 2002.

w3. Rahman S. The effect of traditional birth attendants and tetanus toxoid in reduction of neonatal mortality. *J Trop Pediatr* 1982; **28**:163–65.

w4. Expanded Program on Immunization. Neonatal Tetanus Mortality Surveys – Egypt. *Wkly Epidemiol Rec* 1987; **62**: 332–35.

w5. Rahman M, Chen LC, Chakraborty J, et al. Use of tetanus toxoid for the prevention of neonatal tetanus. 1 Reduction of neonatal mortality by immunization of non-pregnant and pregnant women in rural Bangladesh. *Bull World Health Organ* 1982; **60**: 261–67.

w6. Stroh G, Aye KU, Thaug U, Kyaw LU. Measurement of mortality from neonatal tetanus in Burma. *Bull World Health Organ* 1987; **65**: 309–16.

- w7. Greenwood AM, Armstrong JRM, Byass P, Snow RW, Greenwood BM. Malaria chemoprophylaxis, birth weight and child survival. *Trans R Soc Trop Med Hyg* 1992; **86**: 483–85.
- w8. Steketee RW, Nahlen BL, Parise, ME, Menendez C. The burden of malaria in pregnancy in malaria-endemic areas. *Am J Trop Med Hyg* 2001; **64**: 28–35.
- w9. Chirenda J, Murugasampillay S. Malaria and HIV co-infection: available evidence, gaps and possible interventions. *Cent Afr J Med*. 2003; 49:66-71.
- w10. Kidane G, Morrow R. Teaching mothers to provide home treatment of malaria in Tigray, Ethiopia: a randomised trial. *Lancet* 2000; **356**:550–55.
- w11. Schellenberg D, Menendez C, Kahigwa E, et al. Intermittent treatment for malaria and anaemia control at time of routine vaccinations in Tanzanian infants: a randomised, placebo-controlled trial. *Lancet* 2001; **357**: 1471–77.
- w12. Lengeler C. Insecticide-treated bednets and curtains for preventing malaria (Cochrane Review). In: *The Cochrane Library*, Issue 4 2004. Oxford: Update Software.
- w13. Phillips-Howard PA, Nahlen BL, Kolczak MS, et al. Efficacy of permethrin- treated bed nets in the prevention of mortality in young children in an area of high perennial malaria transmission in western Kenya. *Am J Trop Med Hyg* 2003, **68** (suppl 4): 23–29.
- w14. Hawley WA, Ter Kuile FO, Steketee RS, et al. Implications of the western Kenya permethrin-treated bed net study for policy, program implementation, and future research. *Am J Trop Med Hyg* 2003; **68** (suppl 4): 168–73.
- w15. Korenromp EL, Armstrong-Schellenberg JR, Williams BG, Nahlen BL, Snow RW. Impact of malaria control on childhood anaemia in Africa -- a quantitative review. *Trop Med Int Health*. 2004; 9:1050-65.
- w16. Ter Kuile FO, Terlouw D, Phillips-Howard PA, et al. Reduction of T malaria during pregnancy by permethrin-treated bed nets in an area of intense perennial malaria transmission in western Kenya. *Am J Trop Med Hyg* 2003; **68** (suppl 4): 50–60
- w17. D'Alessandro U, Langerock P, Bennett S, Francis N, Cham K, Greenwood BM. The impact of a national impregnated bed net programme on the outcome of pregnancy in primigravidae in The Gambia. *Trans R Soc Trop Med Hyg* 1996; **90**: 487–92.
- w18. Hill Z, Kirkwood B, Edmond K. Family and community practices that promote child survival, growth and development: a review of the evidence. Geneva: World Health Organization (2004).
- w19. Crowley P. Prophylactic corticosteroids for preterm births. In: *The Cochrane Library*, Issue 1, 2002. Oxford: Update Software.

- w20. Conde-Agudelo A, Diaz-Rossello JL, Belizian JM. Kangaroo mother care to reduce morbidity and mortality in low birthweight infants (Cochrane Review). In: *The Cochrane Library*, Issue 2, 2003. Oxford: Update Software.
- w21. Gosavi DV, Swaminathan, M, Daga SR. Appropriate technology in transportation of sick newborns in developing countries. *Trop Doctor* 1998; **28**: 101–02.
- w22. WHO. The optimal duration of exclusive breastfeeding. A systematic review. Geneva: World Health Organization, 2001.
- w23. Edmond KM, Zandoh C, Quigley MA, Amenga-Etego S, Owusu-Agyei S, Kirkwood BR. Delayed breastfeeding initiation increases risk of neonatal mortality. *Pediatrics*. 2006; 117:e380-6.
- w24. Bahl R, Frost C, Kirkwood BR, Edmond K, Martines J, Bhandari N, Arthur P. Infant feeding patterns and risks of death and hospitalization in the first half of infancy: multicentre cohort study. *Bull World Health Organ*. 2005; 83:418-26.
- w25. Arifeen S, Black RE, Antelman G, Baqui A, Caulfield L, Becker S. Exclusive breastfeeding reduces acute respiratory infection and diarrhea deaths among infants in Dhaka slums. *Pediatrics* 2001; **108**: E67.
- w26. Ashraf RN, Jahil F, Zaman S, Karlberg S, Lindblad B, Hanson L. Breastfeeding and protection against neonatal sepsis in a high risk population. *Arch Dis Child* 1991, **66**: 488–90.
- w27. Bhandari N, Bahl R, Mazumdar S, Martines J, Black RE, Bhan MK; Infant Feeding Study Group. Effect of community-based promotion of exclusive breastfeeding on diarrhoeal illness and growth: a cluster randomised controlled trial. *Lancet*. 2003; 361:1418-23.
- w28. Caulfield LE, Huffman SL, Piwoz EG. Interventions to improve intake of complementary foods by infants 6 to 12 months of age in developing countries: impact on growth and on the prevalence of malnutrition and potential contribution to child survival. *Food Nutr Bull* 1999; **20**: 183–200.
- w29. Penny ME, Creed-Kanashiro HM, Robert RC, Narro MR, Caulfield LE, Black RE. Effectiveness of an educational intervention delivered through the health services to improve nutrition in young children: a cluster-randomised controlled trial. *Lancet*. 2005; 365:1863-72.
- w30. Fewtrell L, Kaufmann RB, Kay D, Enanoria W, Haller L, Colford JM Jr. Water, sanitation, and hygiene interventions to reduce diarrhoea in less developed countries: a systematic review and meta-analysis. *Lancet Infect Dis*. 2005;5:42-52
- w31. Caulfield L, Black RE. Zinc deficiency. In: Ezzati M, Lopez AD, Rogers A, Murray CJL, eds. Comparative quantification of health risks: global and regional burden of disease attributable to selected major risk factors. Geneva, World Health Organization, 2004

w32. Bhutta ZA, Bird SM, Black RE, et al. Therapeutic effects of oral zinc in acute and persistent diarrhea in children in developing countries: pooled analysis of randomized controlled trials. *Am J Clin Nutr* 2000; **72**: 1516–22.

w33. Baqui AH, Black RE, El Arifeen S, et al. Effect of zinc supplementation started during diarrhoea on morbidity and mortality in Bangladeshi children: community randomised trial. *BMJ* 2002; **325**: 1059.

w34. Rice AL, West KP, Black RE. Vitamin A deficiency. In: Ezzati M, Lopez AD, Rogers A, Murray CJL, eds. Comparative quantification of health risks: global and regional burden of disease attributable to selected major risk factors. Geneva, World Health Organization 2003,

w35. Beaton GH, Martorell R, Aronson KJ, et al. Effectiveness of vitamin A supplementation in the control of young child morbidity and mortality in developing countries. ACC/SCN State-of-the-art Series. Nutrition Policy Discussion Paper 13. 1993.

w36. West KP. Extent of vitamin A deficiency among preschool children and women of reproductive age. *J Nutr* 2002; **132**: 2857S–66S.

w37. Wiysonge CS, Shey MS, Sterne JA, Brocklehurst P. Vitamin A supplementation for reducing the risk of mother-to-child transmission of HIV infection. *Cochrane Database Syst Rev*. 2005 ;(4):CD003648

w38. Mulholland K, Hilton S, Adegbola R, et al. Randomized trial of *Haemophilus influenzae* type-b tetanus protein conjugate vaccine for prevention of pneumonia and meningitis in Gambian infants. *Lancet* 1997; **349**: 1191–97.

w39. Cowgill KD, Ndiritu M, Nyiro J, Slack MP, Chipphasi S, Ismail A, Kamau T, Mwangi I, English M, Newton CR, Feikin DR, Scott JA. Effectiveness of *Haemophilus influenzae* type b Conjugate vaccine introduction into routine childhood immunization in Kenya. *JAMA*. 2006;296:671-8.

w40. Aaby P, Samb B, Simondon F, et al. A comparison of vaccine efficacy and mortality during routine use of high titre Edmonston-Zagreb and Schwarz standard measles vaccines in rural Senegal *Trans R Soc Trop Med Hyg* 1996; **90**: 326–30.

w41. Kenyon S, Boulvain M, Neilson J. Antibiotics for preterm premature rupture of membranes (Cochrane Review). In: *The Cochrane Library*, Issue 2, 2002. Oxford: Update Software.

w42. Deorari AK, Paul VK, Singh M, Vidyasagar D, and the Medical Colleges Network. Impact of education and training on neonatal resuscitation practices in 14 teaching hospitals in India. *Annals Trop Paeds* 2001; **21**: 29–33.

w43. Bang AT, Bang RA, Baitule SB, Reddy MH, Dashmukh MD. Effect of home-based neonatal care and management of sepsis on neonatal mortality: field trial in rural India. *Lancet* 1999; **354**: 1955–61.

w44. Sazawal S, Black RE; Pneumonia Case Management Trials Group. Effect of pneumonia case management on mortality in neonates, infants, and preschool children: a meta-analysis of community-based trials. *Lancet Infect Dis*. 2003; 3:547-56.

w45. Sack DA. Use of oral rehydration therapy in acute watery diarrhea. *Drugs* 1991; 41: 566–73.

w46 Hartling L, Bellemare S, Wiebe N, Russell K, Klassen TP, Craig W. Oral versus intravenous rehydration for treating dehydration due to gastroenteritis in children. *Cochrane Database Syst Rev*. 2006 Jul 19; 3:

w47. Salam MA, Bennish ML. Antimicrobial therapy for shigellosis. *Rev Infect Dis* 1991; **13** (suppl): S332–41.

w48. Muhuri PK, Anker M, Bryce J. Treatment patterns for childhood diarrhoea: evidence from demographic and health surveys. *Bull World Health Organ* 1996; **74**: 135–46.

w49. Sazawal S, Black R. Meta-analysis of intervention trials on case management of pneumonia in community settings. *Lancet* 1992; **340**:528–33.

w50. Korenromp EL, Armstrong-Schellenberg JR, Williams BG, Nahlen BL, Snow RW. Impact of malaria control on childhood anaemia in Africa -- a quantitative review. *Trop Med Int Health*. 2004;9:1050-65.

w51. Geerligs PD, Brabin BJ, Eggelte TA. Analysis of the effects of malaria chemoprophylaxis in children on haematological responses, morbidity and mortality. *Bull World Health Organ*. 2003; 81: 205-16.

w52. Geerligs PD, Brabin BJ, Eggelte TA. Analysis of the effects of malaria chemoprophylaxis in children on haematological responses, morbidity and mortality. *Bull World Health Organ*. 2003; 81(3):205-16.

w53. Huiming Y, Chaomin W, Meng M. Vitamin A for treating measles in children. *Cochrane Database Syst Rev*. 2005 ;(4):CD001479.

w54. World Health Organization. Prevention of mother-to-child transmission of HIV: selections and use of nevirapine. Technical note Geneva: World Health Organization, 2001.

w55. DeCock KM, Fowler MG, Mercier E, et al. Prevention of mother-to-child HIV transmission in resource-poor countries: translating research into policy and practice. *JAMA* 2000; **283**:1175–82.

w56. Manandhar DS, Osrin D, Shrestha BP, Mesko N, Morrison J, Tumbahangphe

KM, Tamang S, Thapa S, Shrestha D, Thapa B, Shrestha JR, Wade A, Borghi J, Standing H, Manandhar M, Costello AM; Members of the MIRA Makwanpur trial team. Effect of a participatory intervention with women's groups on birth outcomes in Nepal: cluster-randomised controlled trial. *Lancet*.2004;364:970-9.

w57. Luby SP, Agboatwalla M, Feikin DR, Painter J, Billhimer W, Altaf A, Hoekstra RM. Effect of handwashing on child health: a randomised controlled trial. *Lancet*. 2005 Jul 16-22; 366:225-33.

w58. Chiller TM, Mendoza CE, Lopez MB, Alvarez M, Hoekstra RM, Keswick BH, Luby SP. Reducing diarrhoea in Guatemalan children: randomized controlled trial of flocculant-disinfectant for drinking-water. *Bull World Health Organ*. 2006; 84:28-35.

w59. Mullany LC, Darmstadt GL, Khatry SK, Katz J, LeClerq SC, Shrestha S, Adhikari R, Tielsch JM. Topical applications of chlorhexidine to the umbilical cord for prevention of omphalitis and neonatal mortality in southern Nepal: a Community-based, cluster-randomised trial. *Lancet*. 2006; 367:910-8.

w60. Pattinson RC, Bergh AM, Malan AF, Prinsloo R. Does Kangaroo Mother Care Save Lives? *J Trop Pediatr*. 2006 Jul 5; [Epub ahead of print]

w61. Rahmathullah L, Tielsch JM, Thulasiraj RD, Katz J, Coles C, Devi S, John R, Prakash K, Sadanand AV, Edwin N, Kamaraj C. Impact of supplementing newborn infants with vitamin A on early infant mortality: community based randomised trial in southern India. *BMJ*. 2003; 327:254-9.

w62. Sazawal S, Black RE, Menon VP, Dinghra P, Caulfield LE, Dhingra U, Bagati A. Zinc supplementation in infants born small for gestational age reduces mortality: a prospective, randomized, controlled trial. *Pediatrics*. 2001; 108:1280-6.

w63. Vesikari T, Matson DO, Dennehy P, Van Damme P, Santosham M, Rodriguez Z Dallas MJ, Heyse JF, Goveia MG, Black SB, Shinefield HR, Christie CD, Ylitalo S, Itzler RF, Coia ML, Onorato MT, Adeyi BA, Marshall GS, Gothefors L, Campens D, Karvonen A, Watt JP, O'Brien KL, DiNubile MJ, Clark HF, Boslego JW, Offit PA, Heaton PM; Rotavirus Efficacy and Safety Trial (REST) Study Team. Safety and efficacy of a pentavalent human-bovine (WC3) reassortant rotavirus vaccine. *N Engl J Med*. 2006; 354:23-33.

w64 Ruiz-Palacios GM, Perez-Schael I, Velazquez FR, Abate H, Breuer T, Clemens SC, Chevart B, Espinoza F, Gillard P, Innis BL, Cervantes Y, Linhares AC, Lopez P, Macias-Parra M, Ortega-Barria E, Richardson V, Rivera-Medina DM, Rivera L, Salinas B, Pavia-Ruz

N, Salmeron J, Ruttimann R, Tinoco JC, Rubio P, Nunez E, Guerrero ML, Yarzabal JP, Damaso S, Tornieporth N, Saez-Llorens X, Vergara RF, Vesikari T, Bouckennooghe A, Clemens R, De Vos B, O’Ryan M; Human Rotavirus Vaccine Study Group. Safety and efficacy of an attenuated vaccine against severe rotavirus gastroenteritis. *N Engl J Med.* 2006; 354:11-22.

w65. Calbo E, Diaz A, Canadell E, Fabrega J, Uriz S, Xercavins M, Morera MA, Cuchi E, Rodriguez-Carballeira M, Garau J; the Spanish Pneumococcal Infection Study Network\*. Invasive pneumococcal disease among children in a health district of Barcelona: early impact of pneumococcal conjugate vaccine. *Clin Microbiol Infect.* 2006; 12:867-72.

w66. Madhi SA, Kuwanda L, Cutland C, Klugman KP. The impact of a 9-valent pneumococcal conjugate vaccine on the public health burden of pneumonia in HIV-infected and -uninfected children. *Clin Infect Dis.* 2005; 40:1511-8.

w67. Kossaczka Z, Lin FY, Ho VA, Thuy NT, Van Bay P, Thanh TC, Khiem HB, Trach DD, Karpas A, Hunt S, Bryla DA, Schneerson R, Robbins JB, Szu SC. Safety and immunogenicity of Vi conjugate vaccines for typhoid fever in adults, teenagers, and 2- to 4-year-old children in Vietnam. *Infect Immun.* 1999; 67:5806-10.

w68. Sinha A, Sazawal S, Kumar R, Sood S, Reddaiah VP, Singh B, Rao M, Naficy A, Clemens JD, Bhan MK. Typhoid fever in children aged less than 5 years. *Lancet.* 1999; 354:734-7.

w69. Ho JJ, Subramaniam P, Henderson-Smart DJ, Davis PG. Continuous distending pressure for respiratory distress syndrome in preterm infants. *Cochrane Database Syst Rev.* 2002;(2):CD002271

w70. Sazawal S, Hiremath G, Dhingra U, Malik P, Deb S, Black RE. Efficacy of probiotics in prevention of acute diarrhoea: a meta-analysis of masked, randomised, placebo-controlled trials. *Lancet Infect Dis.* 2006; 6:374-82.

w71. Puthanakit T, Oberdorfer A, Akarathum N, Kanjanavanit S, Wannarit P, Sirisanthana T, Sirisanthana V. Efficacy of highly active antiretroviral therapy in HIV-infected children participating in Thailand’s National Access to Antiretroviral Program. *Clin Infect Dis.* 2005; 41:100-7.

w72. Thior I, Lockman S, Smeaton LM, Shapiro RL, Wester C, Heymann SJ, Gilbert PB, Stevens L, Peter T, Kim S, van Widenfelt E, Moffat C, Ndase P, Arimi P, Kebaabetswe P, Mazonde P, Makhema J, McIntosh K, Novitsky V, Lee TH, Marlink R, Lagakos S, Essex M; Mashi Study Team. Breastfeeding plus infant zidovudine prophylaxis for 6 months vs



formula feeding plus infant zidovudine for 1 month to reduce mother-to-child HIV transmission in Botswana: a randomized trial: the Mashi Study. JAMA. 2006; 296:794-805.

w73. Bhutta ZA, Khan I, Salat S, Raza F, Ara H. Reducing length of stay in hospital for very low birth weight infants by involving mothers in a stepdown unit: an experience from Karachi (Pakistan). BMJ. 2004; 329:1151-5

w74. WHO EMRO. Community based initiatives: Success stories from the Eastern Mediterranean Region. 2006. Document WHO-EM/CBI/054/E/

[[http://www.emro.who.int/cbi/pdf/CBI\\_SuccessStories.pdf](http://www.emro.who.int/cbi/pdf/CBI_SuccessStories.pdf)]

w75 Transparency International. Corruption Perception Index (CPI) 2005.

[[http://www.transparency.org/policy\\_research/surveys\\_indices/cpi](http://www.transparency.org/policy_research/surveys_indices/cpi). Accessed July 26, 2006]

w76 Kaufmann D, Kraay A, Mastruzzi M. Governance Matters IV: Governance Indicators for 1996-2004. The World Bank Policy Research Working Paper 3630, June 2005. [[www.worldbank.org/wbi/governance/govdata](http://www.worldbank.org/wbi/governance/govdata) accessed July 26, 2006]

w77 United Nations Development Program. Arab Human Development Report 2003. Building a Knowledge Society. [<http://www.undp.org.sa/Reports/AHDR%202003%20-%20English.pdf>, accessed July 26, 2006]

Web Table A

Attributable mortality reduction impact and pathway for child survival interventions in countries with high mortality

| Intervention                                                                    | Cause of death           |           |         |         |          |                          |                  |                  |                   |            |
|---------------------------------------------------------------------------------|--------------------------|-----------|---------|---------|----------|--------------------------|------------------|------------------|-------------------|------------|
|                                                                                 | Diarrhea                 | Pneumonia | Measles | Malaria | HIV/AIDS | Neonatal causes of death |                  |                  |                   |            |
|                                                                                 |                          |           |         |         |          | Birth asphyxia           | Preterm delivery | Neonatal tetanus | Severe infections | Congenital |
|                                                                                 | Preventive interventions |           |         |         |          |                          |                  |                  |                   |            |
| Periconceptual folic acid supplementation (w1)                                  |                          |           |         |         |          |                          |                  |                  |                   | 4%         |
| Effective antenatal care (w1, w2 )                                              |                          |           |         |         |          | 9%                       | 2%               |                  | 1%                |            |
| Tetanus toxoid (w3, w 4-6)                                                      |                          |           |         |         |          |                          |                  | 50%              |                   |            |
| Intermittent antimalarial preventive treatment in pregnancy (w9,w10,w7,w8, w11) |                          |           |         |         |          |                          |                  |                  | 0.5 %             |            |
| Insecticide-treated materials (w12-15, w16-17)                                  |                          |           |         | 59%     |          |                          |                  |                  |                   |            |
| Treatment of asymptomatic bacteriuria in pregnancy (w1)                         |                          |           |         |         |          |                          | 6%               |                  |                   |            |
| Skilled maternal & immediate newborn care (w1, w18)                             |                          |           |         |         |          | 23%                      | 4%               | 14%              | 7%                |            |
| Antenatal steroids (w47)                                                        |                          |           |         |         |          |                          | 18%              |                  |                   |            |



|                                                              |  |  |           |            |            |  |  |  |  |  |
|--------------------------------------------------------------|--|--|-----------|------------|------------|--|--|--|--|--|
| <b>Appropriate antimalarial treatment (w15, w7, w51-w52)</b> |  |  |           | <b>11%</b> |            |  |  |  |  |  |
| <b>Vitamin A for measles (w53)</b>                           |  |  | <b>3%</b> |            |            |  |  |  |  |  |
| <b>Antiretroviral treatment of HIV/AIDS (w54-55)</b>         |  |  |           |            | <b>68%</b> |  |  |  |  |  |

**Web Table B**  
**Interventions that may improve Child Survival in WHO EMR at health system level**

| <b>Delivery Strategies</b>               | <b>Interventions included</b>                                                                                                                                                                                                                                                                                                                                                                                                                                                                                                           | <b>Current status of evidence and effectiveness research</b>                                                                                                                                                                                       | <b>Research Priorities</b>                                                                                                                                                                                                                                                                                                                                                                                                                                                                                                                                                                                                                                                                                                              |
|------------------------------------------|-----------------------------------------------------------------------------------------------------------------------------------------------------------------------------------------------------------------------------------------------------------------------------------------------------------------------------------------------------------------------------------------------------------------------------------------------------------------------------------------------------------------------------------------|----------------------------------------------------------------------------------------------------------------------------------------------------------------------------------------------------------------------------------------------------|-----------------------------------------------------------------------------------------------------------------------------------------------------------------------------------------------------------------------------------------------------------------------------------------------------------------------------------------------------------------------------------------------------------------------------------------------------------------------------------------------------------------------------------------------------------------------------------------------------------------------------------------------------------------------------------------------------------------------------------------|
| Family and community                     | <ol style="list-style-type: none"> <li>1. Breastfeeding promotion</li> <li>2. Complementary feeding promotion</li> <li>3. Water &amp; Sanitation services and hygiene promotion</li> <li>4. Thermal care &amp; early breast feeding</li> <li>5. ORT promotion</li> <li>6. Community antibiotics use for pneumonia</li> </ol>                                                                                                                                                                                                            | <p align="center">I</p> <p align="center">II</p> <p align="center">II</p> <p align="center">II</p> <p align="center">I</p> <p align="center">II</p>                                                                                                | <ol style="list-style-type: none"> <li>1. Effectiveness evaluation of these packages of care through alternative cadres of health care workers</li> <li>2. Evaluation of behavior change communication through low cost strategies e.g. community support groups and peer counseling</li> <li>3. Evaluation of conditional cash transfers and economic schemes to promote use of evidence-based commodities at household level including water purification and sanitation interventions</li> </ol>                                                                                                                                                                                                                                     |
| Outreach                                 | <ol style="list-style-type: none"> <li>1. Effective antenatal care</li> <li>2. Insecticide treated bed nets in pregnancy and childhood</li> <li>3. Intermittent Preventive Treatment for malaria in pregnancy</li> <li>4. Vitamin A supplementation (newborn and infant)</li> <li>5. Tetanus toxoid administration</li> <li>6. Periconceptual folic acid supplementation.</li> <li>7. Appropriate antimalarials</li> <li>8. Zinc treatment of diarrhea</li> </ol>                                                                       | <p align="center">I</p> <p align="center">I</p> <p align="center">II</p> <p align="center">I</p> <p align="center">I</p> <p align="center">II</p> <p align="center">II</p>                                                                         | <ol style="list-style-type: none"> <li>1. Research needed on delivery strategies for malaria prevention and treatment strategies, including social marketing for bed nets</li> <li>2. Determination of levels of care and protocols that can be safely adopted by community health workers including adapted community IMCI for recognition and treatment of febrile illnesses and pneumonia</li> <li>3. Reaching high risk groups for pre-conceptual nutrition interventions</li> <li>4. Reaching and treating newborn infants in domiciliary settings during the first three days of life</li> <li>5. Scaling up the use of zinc and other micronutrient supplements through community health workers</li> </ol>                      |
| Clinical or facility based interventions | <ol style="list-style-type: none"> <li>1. Complementary feeding promotion</li> <li>2. Zinc for the treatment of diarrhea</li> <li>3. Measles vaccine</li> <li>4. Hib vaccine</li> <li>5. Peri-conceptual folic acid supplementation.</li> <li>6. Antiretroviral treatment for HIV/AIDS</li> <li>7. Treatment of asymptomatic bacteriuria</li> <li>8. Antenatal steroids</li> <li>9. Skilled maternal &amp; immediate newborn care</li> <li>10. Extra care of LBW infants</li> <li>11. Emergency Obstetric &amp; Newborn Care</li> </ol> | <p align="center">II</p> <p align="center">I</p> <p align="center">I</p> <p align="center">I</p> <p align="center">I</p> <p align="center">I</p> <p align="center">II</p> <p align="center">I</p> <p align="center">I</p> <p align="center">II</p> | <ol style="list-style-type: none"> <li>1. Establishing effectiveness of integrated breastfeeding and complementary feeding promotion strategies in health system settings</li> <li>2. Developing and evaluating strategies for low cost neonatal care including thermoregulation especially for high risk infants in secondary level facilities</li> <li>3. Infection prevention strategies in facility settings to reduce health care associated infections.</li> <li>4. Appropriate strategies for cost effective short course treatment modalities for common childhood infections (e.g. severe pneumonia, typhoid, dysentery, meningitis)</li> <li>5. Effective minimal packages for high-risk maternal and newborn care</li> </ol> |

|  |                                                                                                                                                                |                        |  |
|--|----------------------------------------------------------------------------------------------------------------------------------------------------------------|------------------------|--|
|  | 12. Antibiotics for dysentery, neonatal pneumonia & sepsis<br>13. Vitamin A administration for treatment<br>14. Antibiotics for prolonged rupture of membranes | I<br>I<br>I<br>I<br>II |  |
|  |                                                                                                                                                                |                        |  |

**Level of evidence**

I = Well established evidence from large effectiveness studies and systematic reviews

II = Strong

Published as supplied by the authors

**Fig A Map of child mortality in EMR region**

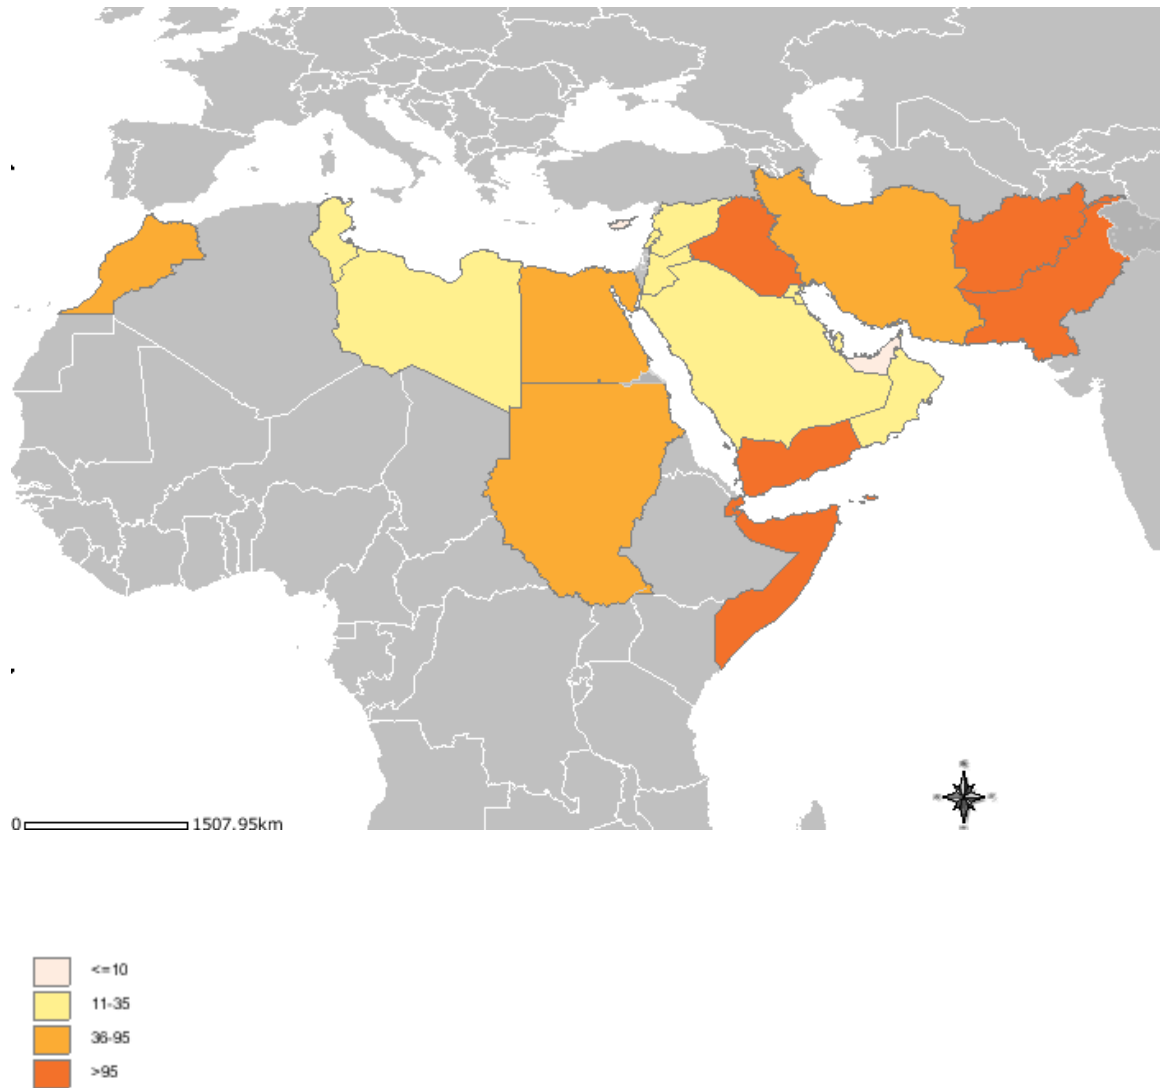

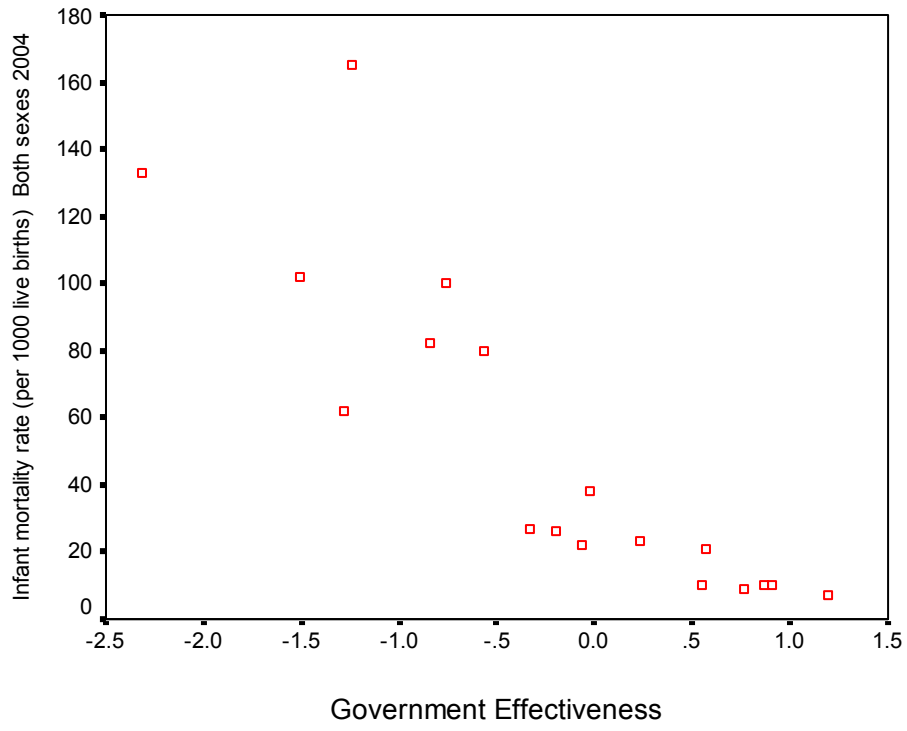

**Web Figure B**  
**Relationship of government effectiveness and infant mortality rates in EMR countries**



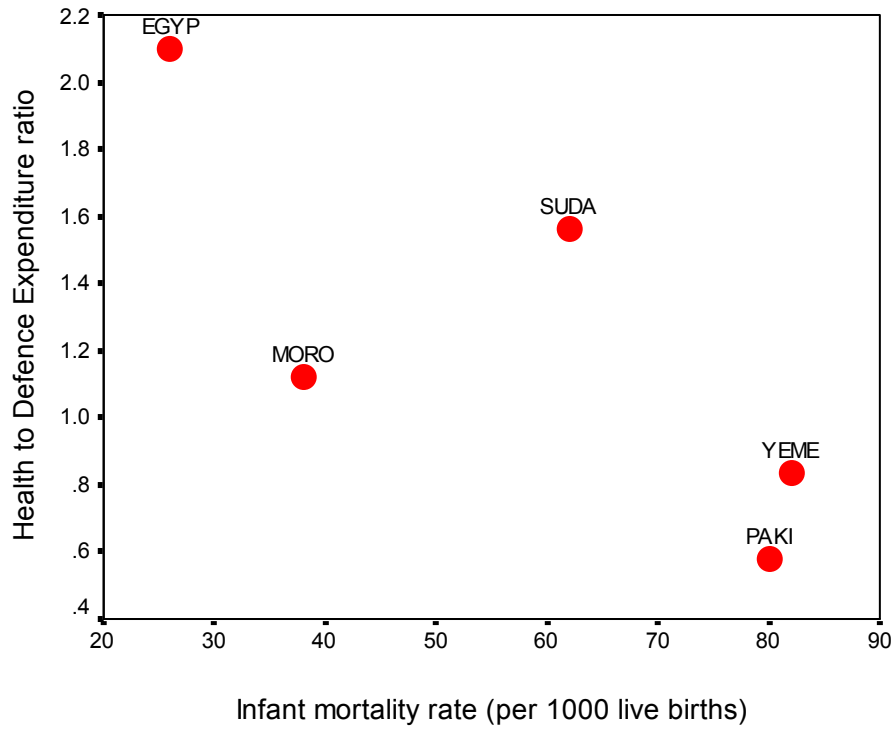

**Web Figure C**  
**Health to defense expenditure ratio and infant mortality in the EMR countries with the highest numbers of child deaths**

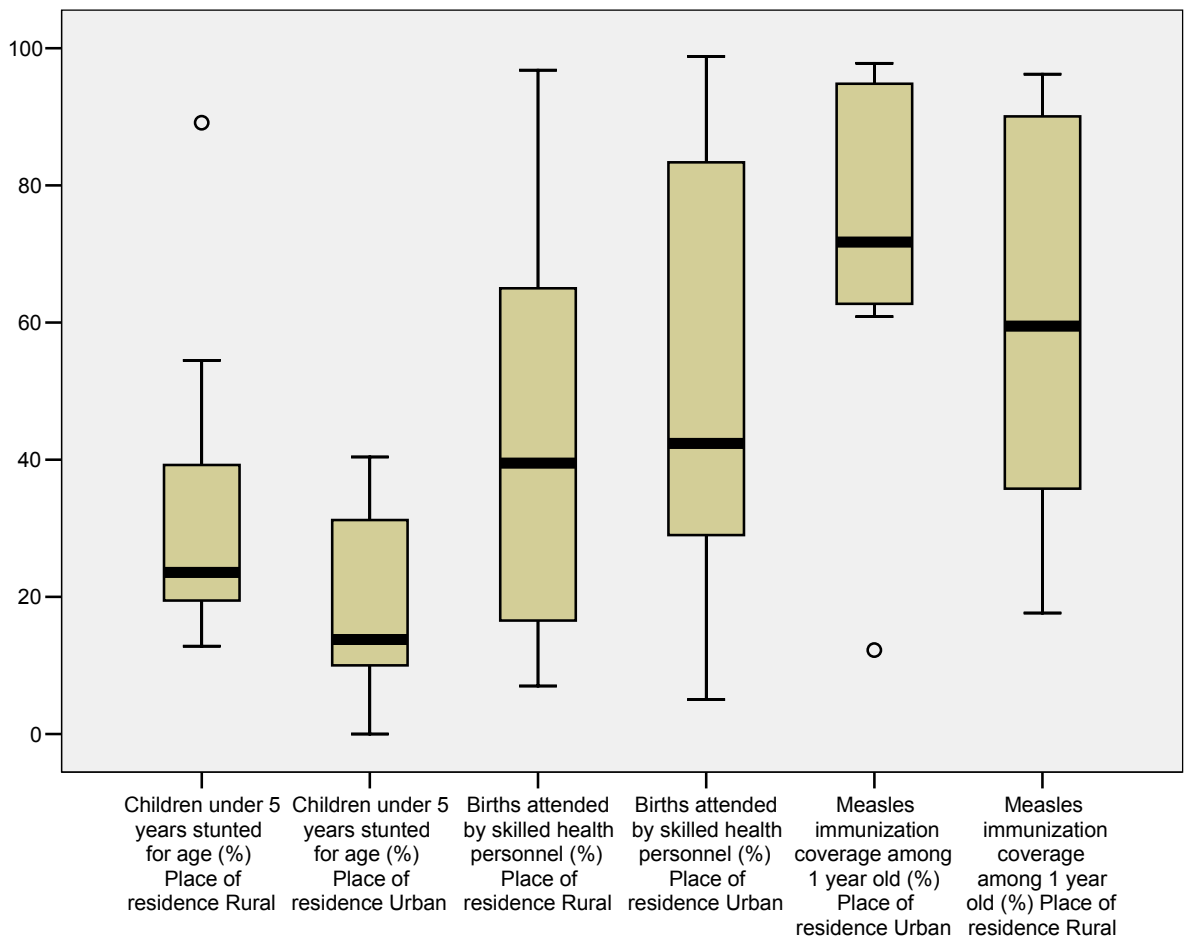

**Figure D:- Differentials among interventions coverage between rural and urban populations in EMR region**
